# Supplementary material
Source: ML conference proceedings conference paper supplement (https://openreview.net/forum?id=OCxhcqUtDf)

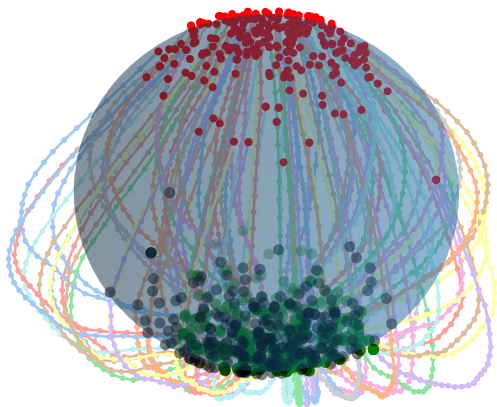

Supplement: supplementary_material [file img_10000.pdf › hota_supplement/code/figures/shpere3d/img_10000.pdf]

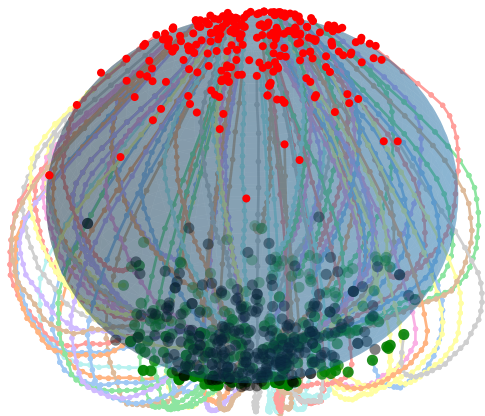

Supplement: supplementary_material [file img_15000.pdf › hota_supplement/code/figures/shpere3d/img_15000.pdf]

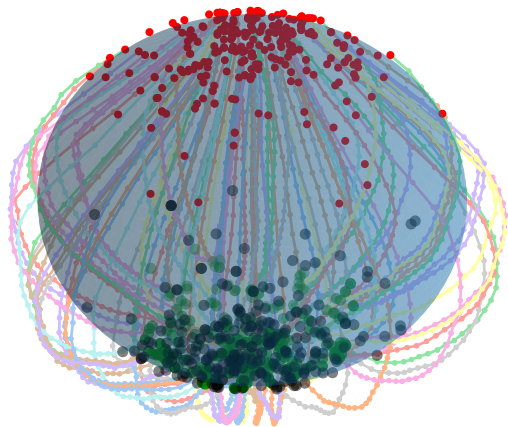

Supplement: supplementary_material [file img_20000.pdf › hota_supplement/code/figures/shpere3d/img_20000.pdf]

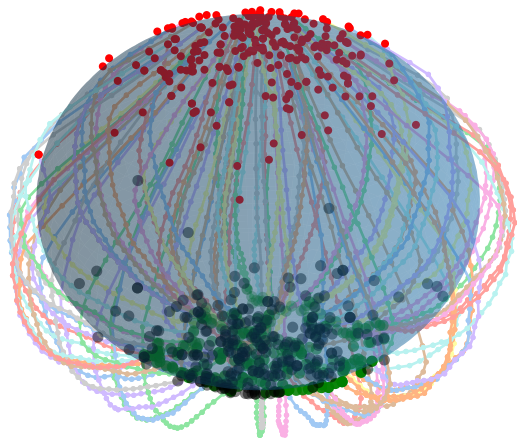

Supplement: supplementary_material [file img_25000.pdf › hota_supplement/code/figures/shpere3d/img_25000.pdf]

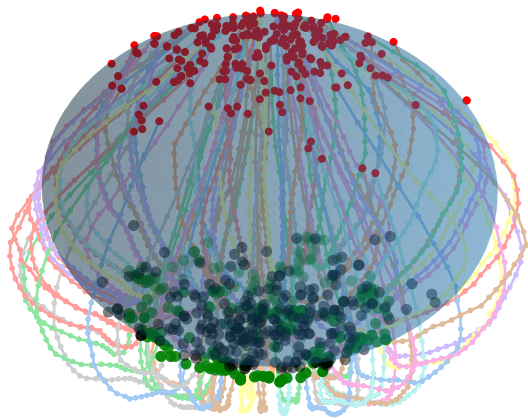

Supplement: supplementary_material [file img_30000.pdf › hota_supplement/code/figures/shpere3d/img_30000.pdf]

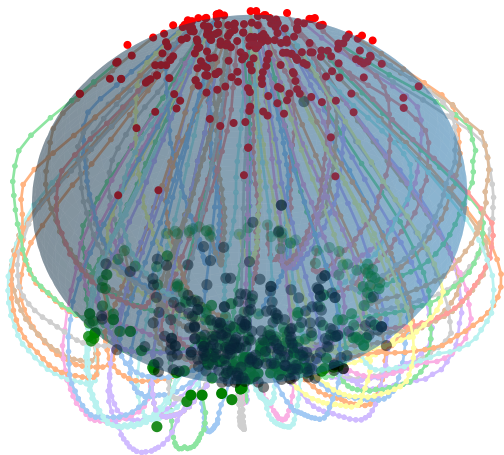

Supplement: supplementary_material [file img_35000.pdf › hota_supplement/code/figures/shpere3d/img_35000.pdf]

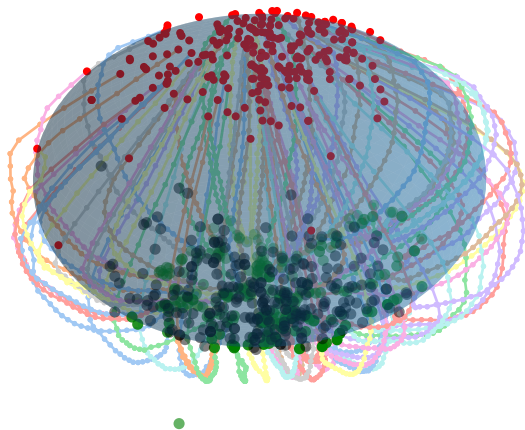

Supplement: supplementary_material [file img_40000.pdf › hota_supplement/code/figures/shpere3d/img_40000.pdf]

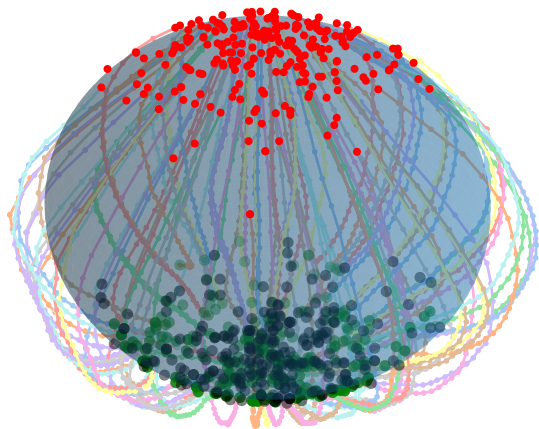

Supplement: supplementary_material [file img_45000.pdf › hota_supplement/code/figures/shpere3d/img_45000.pdf]

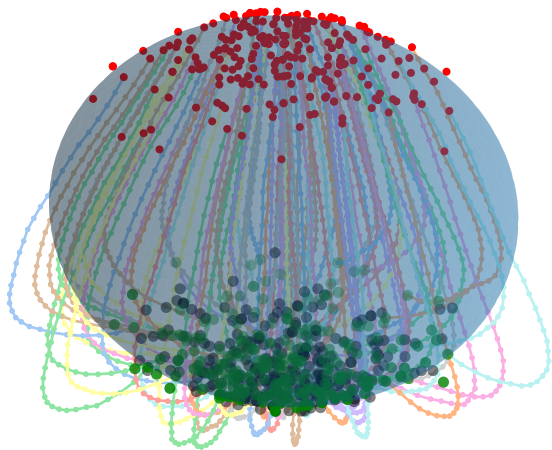

Supplement: supplementary_material [file img_5000.pdf › hota_supplement/code/figures/shpere3d/img_5000.pdf]

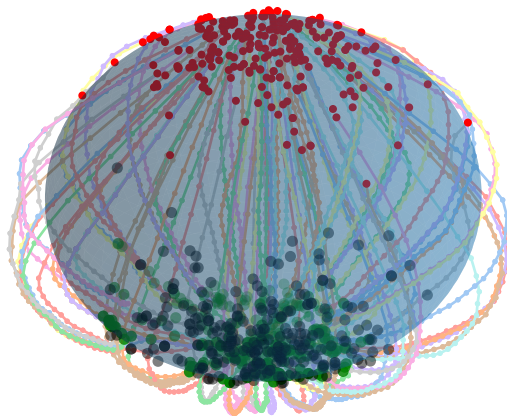

Supplement: supplementary_material [file img_50000.pdf › hota_supplement/code/figures/shpere3d/img_50000.pdf]

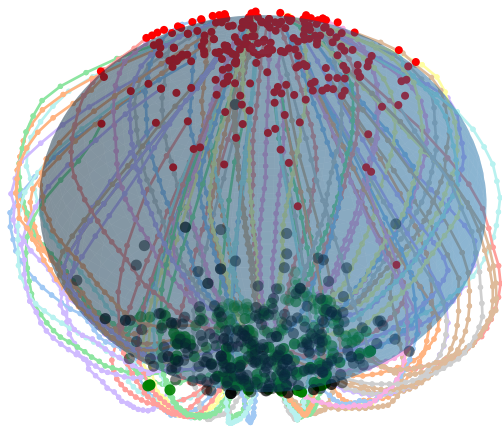

Supplement: supplementary_material [file img_55000.pdf › hota_supplement/code/figures/shpere3d/img_55000.pdf]

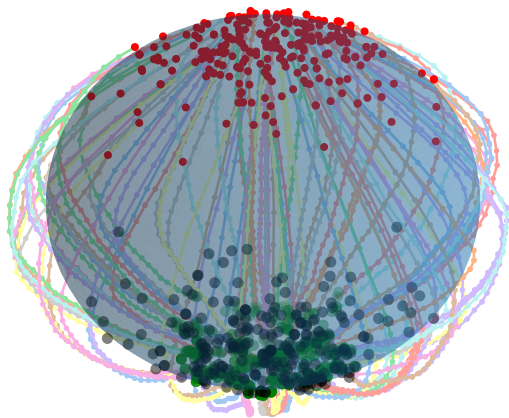

Supplement: supplementary_material [file img_60000.pdf › hota_supplement/code/figures/shpere3d/img_60000.pdf]

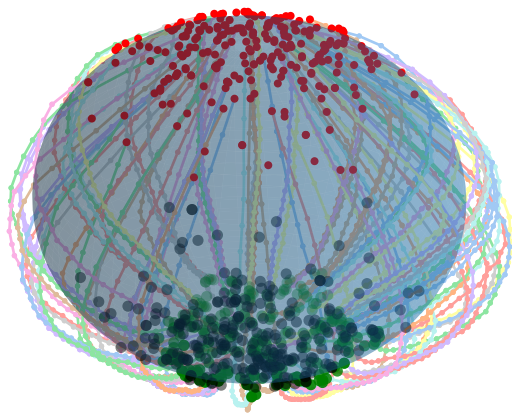

Supplement: supplementary_material [file img_65000.pdf › hota_supplement/code/figures/shpere3d/img_65000.pdf]

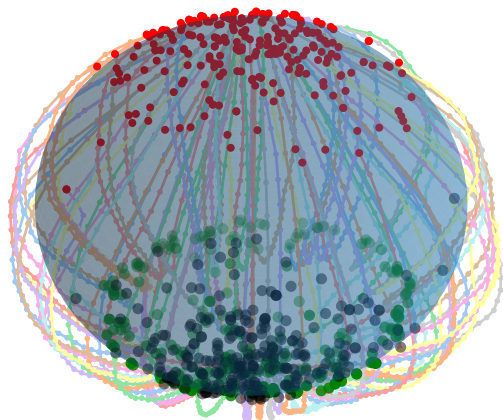

Supplement: supplementary_material [file img_70000.pdf › hota_supplement/code/figures/shpere3d/img_70000.pdf]
